# Supplementary material for: Silver(i) supramolecular complexes generated from isophorone-based ligands: crystal structures and enhanced nonlinear optical properties through metal complexation
Source: Royal Society of Chemistry journal article supplement (doi:10.1039/c3dt52364k), 2013-10-07
Supplement: c3dt52364k.pdf [file c3dt52364k.pdf]

## Supporting Information

### Silver(I) supramolecular complexes generated from isophorone-based ligands: crystal structures and enhanced nonlinear optical properties through metal complexation

Zheng Zheng,<sup>a</sup> Zhi-Peng Yu,<sup>a</sup> Ming-Di Yang,<sup>a</sup> Feng Jin,<sup>\*ab</sup> Li-Na Ye,<sup>a</sup> Min Fang,<sup>a</sup>  
Hong-Ping Zhou,<sup>\*a</sup> Jie-Ying Wu,<sup>a</sup> Yu-Peng Tian<sup>ac</sup>

<sup>a</sup>College of Chemistry and Chemical Engineering, Anhui University, Key Laboratory of Functional Inorganic Materials Chemistry of Anhui Province, 230601 Hefei, P. R. China. E-mail: zhpzhp@263.net; Fax: +86-551-5107342; Tel: +86-551-5108151

<sup>b</sup>Department of Chemistry, Fuyang Normal College, Fuyang 236041, P. R. China

<sup>c</sup>State Key Laboratory of Coordination Chemistry, Nanjing University, Nanjing 210093, P. R. China

\*Corresponding author. E-mail: [zhpzhp@263.net](mailto:zhpzhp@263.net) (H. -P. Zhou).

#### Synthesis of L<sup>1</sup> and L<sup>2</sup>

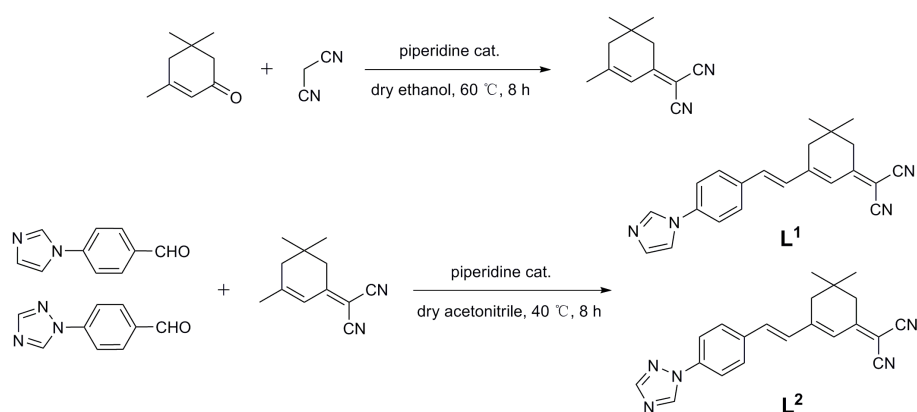

Scheme S1 Synthesis of ligands L<sup>1</sup> and L<sup>2</sup>.

**Preparation of L<sup>1</sup>.** Under nitrogen, 4-(1H-imidazol-1-yl)benzaldehyde (2.4 g, 13.8mmol) and 2-(3,5,5-trimethylcyclohex-2-enylidene)malononitrile (2.6 g,

13.8mmol) were dissolved in dry acetonitrile (100 mL). 10 drops of piperidine was added and the solution was stirred at 40 °C for 8 h. After cooling the reaction mixture, the yellow precipitate was filtered, washed with acetonitrile, and dried. Yield: 2.50 g (53 %). <sup>1</sup>H NMR: (400 Hz, CD<sub>3</sub>Cl), δ (ppm): 7.92 (s, 1H), 7.63 (d, *J* = 8.4 Hz, 2H), 7.44 (d, *J* = 8.4 Hz, 2H), 7.33 (s, 1H), 7.2 (s, 1H), 7.04 (d, *J* = 16.0 Hz, 1H), 7.02 (d, *J* = 16.0 Hz, 1H), 6.88 (s, 1H), 2.62 (s, 2H), 2.48 (s, 2H), 1.10 (s, 6H). <sup>13</sup>C NMR (100 MHz, CDCl<sub>3</sub>): δ (ppm) = 169.0, 153.1, 137.9, 135.4, 135.0, 134.8, 130.9, 130.0, 129.0, 124.1, 121.5, 117.8, 113.3, 112.6, 79.4, 43.0, 39.2, 32.0, 28.0. IR (KBr, cm<sup>-1</sup>): 2965, 2925, 2870, 2218, 1608, 1572, 1511, 1455, 1400, 1054, 813. MALDI-TOF Calcd for C<sub>22</sub>H<sub>20</sub>N<sub>4</sub>, 340.17; Found, 341.179.

**Preparation of L<sup>2</sup>.** The yellow crystals L<sup>2</sup> was prepared according to a similar procedure of L<sup>1</sup> using 4-(1H-1,2,4-triazol-1-yl)benzaldehyde instead of 4-(1H-imidazol-1-yl) benzaldehyde. Yield: 4.00 g (85 %). <sup>1</sup>H NMR: (400 Hz, CD<sub>3</sub>Cl), δ (ppm): 8.62 (s, 1H), 8.13 (s, 1H), 7.75 (d, *J* = 8.4 Hz, 2H), 7.66 (d, *J* = 8.8 Hz, 2H), 7.09 (d, *J* = 16.0 Hz, 1H), 7.04 (d, *J* = 16.0 Hz, 1H), 6.89 (s, 1H), 2.62 (s, 2H), 2.48 (s, 2H), 1.10 (s, 6H). <sup>13</sup>C NMR (100 MHz, CDCl<sub>3</sub>): δ (ppm) = 169.0, 153.0, 152.8, 140.7, 137.4, 135.5, 135.0, 130.2, 128.8, 124.3, 120.2, 113.2, 112.5, 79.5, 43.0, 39.2, 32.0, 28.0. IR (KBr, cm<sup>-1</sup>): 2959, 2922, 2870, 2216, 1607, 1564, 1519, 1460, 1399, 1049, 811. MALDI-TOF Calcd for C<sub>21</sub>H<sub>19</sub>N<sub>5</sub>, 341.16; Found, 342.171.

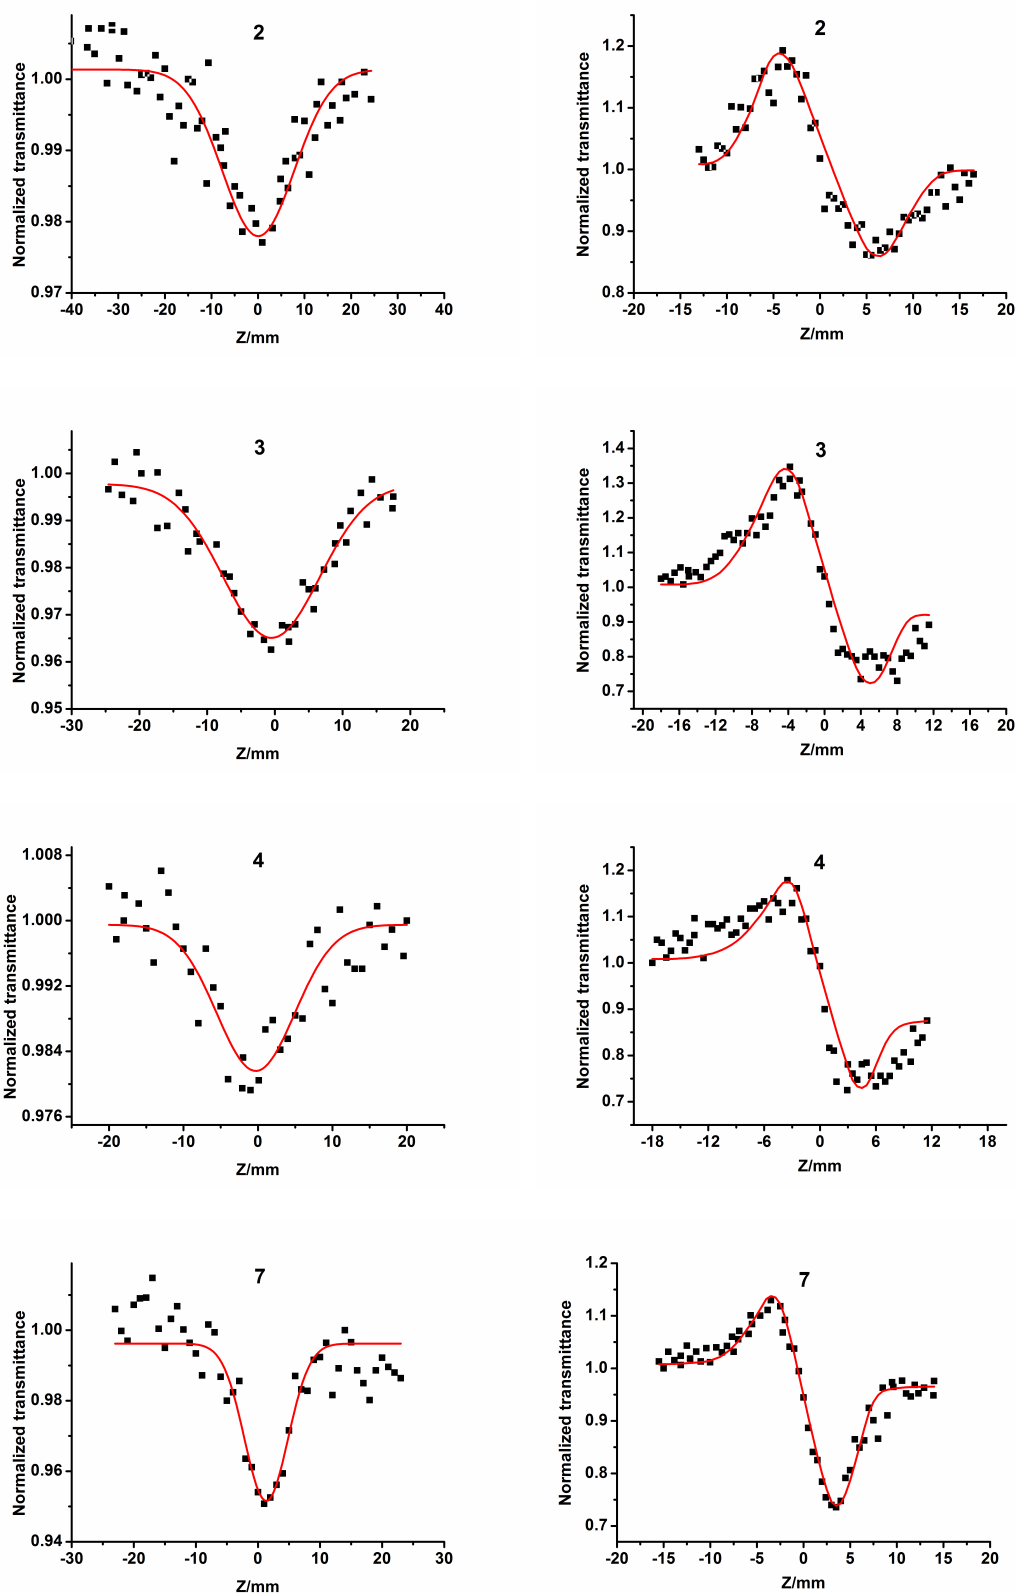

**Fig. S1** The open aperture (right) and closed aperture (left) Z-scan data of complexes 2, 3, 4 and 7. The filled squares represent the experimental data and the solid curve is the theoretical data.
